# Supplementary material for: Methionine uptake via the SLC43A2 transporter is essential for regulatory T-cell survival
Source: Life Sci Alliance. 2022 Sep 9;5(12):e202201663. doi: 10.26508/lsa.202201663 (PMC9463494; doi:10.26508/lsa.202201663)
Supplement: Supplementary file 1 [file LSA-2022-01663_SdataF1.xlsx]

## Sheet: Steady state raw peak areas
n=1 (part 1)				Samples n=1 (part 1)	n=1 (part 2)				Samples n=1 (part 2)	n=2				Samples n=2
Sample Name	Component Name	Area	Retention Time	SC1-T0	Sample Name	Component Name	Area	Retention Time	SC7 – T0 (2M)	Sample Name	Component Name	Area	Retention Time	SC14 – CMDS-IL2 for 1hr
Blank_1	Asp	N/A	N/A	SC2- CMDS-IL2 1hr	Blank_1	Asp	84640.5	3.30827	SC8 – CMDS-IL2 for 3hr	Blank_1	Asp	130689	3.27144	SC16 – CMDS-IL2 for 3hr
Blank_1	Arg	4770.55	2.85106		Blank_1	Arg	N/A	N/A	SC10 – CMDS-IL2 for 6hr	Blank_1	Arg	2139.88	2.94927	SC17- CMDS-IL-2 for 6hrs
Blank_1	SAM	N/A	N/A		Blank_1	SAM	N/A	N/A		Blank_1	SAM	N/A	N/A	SC18 – T0
Blank_1	SAH	N/A	N/A		Blank_1	SAH	N/A	N/A		Blank_1	SAH	N/A	N/A
Blank_1	Met	N/A	N/A		Blank_1	Met	N/A	N/A		Blank_1	Met	N/A	N/A
Blank_1	Glu	1842.22	3.47479		Blank_1	Glu	1555.61	3.47025		Blank_1	Glu	1080.05	3.51015
Blank_1	GSH	N/A	N/A		Blank_1	GSH	N/A	N/A		Blank_1	GSH	N/A	N/A
Blank_1	GSSG	N/A	N/A		Blank_1	GSSG	N/A	N/A		Blank_1	GSSG	N/A	N/A
Blank_1	Cys	N/A	N/A		Blank_1	Cys	2068.25	3.59959		Blank_1	Cys	7298.31	3.55425
Blank_1	Lys	1314.61	2.58491		Blank_1	Lys	1959.22	2.62442		Blank_1	Lys	3921.87	2.59398
Blank_1	His	N/A	N/A		Blank_1	His	N/A	N/A		Blank_1	His	4840.47	2.79872
Blank_1	Ala	N/A	N/A		Blank_1	Ala	N/A	N/A		Blank_1	Ala	3517.54	3.34792
Blank_1	Ser	2420.26	3.29431		Blank_1	Ser	735.714	2.82447		Blank_1	Ser	4733.96	3.38972
Blank_1	Asn	1068.09	3.41434		Blank_1	Asn	N/A	N/A		Blank_1	Asn	N/A	N/A
Blank_1	Thr	N/A	N/A		Blank_1	Thr	2324.83	3.39751		Blank_1	Thr	N/A	N/A
Blank_1	Pro	N/A	N/A		Blank_1	Pro	N/A	N/A		Blank_1	Pro	2031.62	3.86243
Blank_1	Val	N/A	N/A		Blank_1	Val	N/A	N/A		Blank_1	Val	1433.78	4.65829
Blank_1	Leu	N/A	N/A		Blank_1	Leu	26192.7	6.46843		Blank_1	Leu	N/A	N/A
Blank_1	Phe	4299.63	8.73838		Blank_1	Phe	2123.87	8.74624		Blank_1	Phe	4185	8.76395
Blank_1	Trp	1635.29	10.2777		Blank_1	Trp	N/A	N/A		Blank_1	Trp	N/A	N/A
Blank_1	Tyr	N/A	N/A		Blank_1	Tyr	2155.04	6.59412		Blank_1	Tyr	21954.6	6.79671
Blank_1	Gln	922.273	3.82503		Blank_1	Gln	N/A	N/A		Blank_1	Gln	N/A	N/A
Blank_1	Ile	N/A	N/A		Blank_1	Ile	N/A	N/A		Blank_1	Ile	N/A	N/A
Blank_1	Phe_2	44472	8.79967		Blank_1	Phe_2	8715.21	8.74413		Blank_1	Phe_2	18563.2	8.65967
Blank_2	Asp	N/A	N/A		Blank_2	Asp	96873.2	3.68123		Blank_2	Asp	16317.3	3.38173
Blank_2	Arg	1807.78	2.85977		Blank_2	Arg	N/A	N/A		Blank_2	Arg	2968.03	3.01102
Blank_2	SAM	N/A	N/A		Blank_2	SAM	N/A	N/A		Blank_2	SAM	N/A	N/A
Blank_2	SAH	N/A	N/A		Blank_2	SAH	N/A	N/A		Blank_2	SAH	N/A	N/A
Blank_2	Met	N/A	N/A		Blank_2	Met	N/A	N/A		Blank_2	Met	N/A	N/A
Blank_2	Glu	945.498	3.48075		Blank_2	Glu	N/A	N/A		Blank_2	Glu	2382.04	3.51469
Blank_2	GSH	N/A	N/A		Blank_2	GSH	N/A	N/A		Blank_2	GSH	1767.98	6.00965
Blank_2	GSSG	N/A	N/A		Blank_2	GSSG	N/A	N/A		Blank_2	GSSG	N/A	N/A
Blank_2	Cys	N/A	N/A		Blank_2	Cys	784.275	3.28001		Blank_2	Cys	2795.5	3.65939
Blank_2	Lys	676.823	2.60303		Blank_2	Lys	N/A	N/A		Blank_2	Lys	N/A	N/A
Blank_2	His	1265.58	2.92418		Blank_2	His	N/A	N/A		Blank_2	His	N/A	N/A
Blank_2	Ala	N/A	N/A		Blank_2	Ala	1326.29	3.32643		Blank_2	Ala	N/A	N/A
Blank_2	Ser	N/A	N/A		Blank_2	Ser	N/A	N/A		Blank_2	Ser	1692.99	3.20079
Blank_2	Asn	N/A	N/A		Blank_2	Asn	N/A	N/A		Blank_2	Asn	4527.52	3.34059
Blank_2	Thr	N/A	N/A		Blank_2	Thr	1006.52	3.4349		Blank_2	Thr	N/A	N/A
Blank_2	Pro	N/A	N/A		Blank_2	Pro	1617.16	4.01709		Blank_2	Pro	1300.44	4.0676
Blank_2	Val	N/A	N/A		Blank_2	Val	N/A	N/A		Blank_2	Val	N/A	N/A
Blank_2	Leu	2897.46	6.62435		Blank_2	Leu	1368.94	6.47174		Blank_2	Leu	8303.21	6.45234
Blank_2	Phe	7215.32	8.82432		Blank_2	Phe	2496.97	8.83524		Blank_2	Phe	11618.7	8.96024
Blank_2	Trp	2841.6	9.97551		Blank_2	Trp	2595.16	10.0065		Blank_2	Trp	N/A	N/A
Blank_2	Tyr	1205.89	6.7743		Blank_2	Tyr	1435.13	6.73462		Blank_2	Tyr	1021.26	6.90167
Blank_2	Gln	N/A	N/A		Blank_2	Gln	N/A	N/A		Blank_2	Gln	1119.8	3.71755
Blank_2	Ile	2243.5	6.06143		Blank_2	Ile	N/A	N/A		Blank_2	Ile	N/A	N/A
Blank_2	Phe_2	31247.9	8.75325		Blank_2	Phe_2	8053.26	8.86165		Blank_2	Phe_2	10413.1	8.84206
Blank_3	Asp	1605.88	3.50864		Blank_3	Asp	42341.7	3.58332		Blank_3	Asp	24583.1	3.60392
Blank_3	Arg	6185.72	2.85298		Blank_3	Arg	1515.46	2.9562		Blank_3	Arg	6071.78	2.91935
Blank_3	SAM	N/A	N/A		Blank_3	SAM	N/A	N/A		Blank_3	SAM	N/A	N/A
Blank_3	SAH	N/A	N/A		Blank_3	SAH	N/A	N/A		Blank_3	SAH	N/A	N/A
Blank_3	Met	N/A	N/A		Blank_3	Met	N/A	N/A		Blank_3	Met	N/A	N/A
Blank_3	Glu	1233.2	3.48811		Blank_3	Glu	N/A	N/A		Blank_3	Glu	2298.45	3.51055
Blank_3	GSH	N/A	N/A		Blank_3	GSH	N/A	N/A		Blank_3	GSH	N/A	N/A
Blank_3	GSSG	N/A	N/A		Blank_3	GSSG	N/A	N/A		Blank_3	GSSG	N/A	N/A
Blank_3	Cys	1389.25	3.1781		Blank_3	Cys	N/A	N/A		Blank_3	Cys	1685.21	3.64054
Blank_3	Lys	N/A	N/A		Blank_3	Lys	N/A	N/A		Blank_3	Lys	2325.55	2.9407
Blank_3	His	N/A	N/A		Blank_3	His	N/A	N/A		Blank_3	His	N/A	N/A
Blank_3	Ala	N/A	N/A		Blank_3	Ala	N/A	N/A		Blank_3	Ala	3315.44	3.22953
Blank_3	Ser	2498.63	3.32855		Blank_3	Ser	1581.41	3.32401		Blank_3	Ser	N/A	N/A
Blank_3	Asn	1047.2	3.75841		Blank_3	Asn	7149.72	3.26896		Blank_3	Asn	N/A	N/A
Blank_3	Thr	N/A	N/A		Blank_3	Thr	N/A	N/A		Blank_3	Thr	1248.81	3.32883
Blank_3	Pro	1347.23	3.49933		Blank_3	Pro	2210.7	3.85253		Blank_3	Pro	1030.69	4.19202
Blank_3	Val	N/A	N/A		Blank_3	Val	N/A	N/A		Blank_3	Val	N/A	N/A
Blank_3	Leu	4014.16	6.63088		Blank_3	Leu	N/A	N/A		Blank_3	Leu	N/A	N/A
Blank_3	Phe	9393.93	8.90241		Blank_3	Phe	1782.3	8.97583		Blank_3	Phe	10594.2	8.89889
Blank_3	Trp	2046.45	9.80415		Blank_3	Trp	N/A	N/A		Blank_3	Trp	N/A	N/A
Blank_3	Tyr	N/A	N/A		Blank_3	Tyr	2171.65	7.15691		Blank_3	Tyr	1175.23	6.88985
Blank_3	Gln	N/A	N/A		Blank_3	Gln	N/A	N/A		Blank_3	Gln	2565.42	3.39568
Blank_3	Ile	N/A	N/A		Blank_3	Ile	N/A	N/A		Blank_3	Ile	N/A	N/A
Blank_3	Phe_2	88562.9	8.85734		Blank_3	Phe_2	2536.79	8.74145		Blank_3	Phe_2	11804.7	8.84746
Blank_4	Asp	1318.8	3.48596		Blank_4	Asp	35859	3.5533		Blank_4	Asp	23221.6	3.46394
Blank_4	Arg	8661.18	2.86625		Blank_4	Arg	2286.15	2.83891		Blank_4	Arg	3520.98	2.89928
Blank_4	SAM	N/A	N/A		Blank_4	SAM	N/A	N/A		Blank_4	SAM	N/A	N/A
Blank_4	SAH	N/A	N/A		Blank_4	SAH	N/A	N/A		Blank_4	SAH	N/A	N/A
Blank_4	Met	N/A	N/A		Blank_4	Met	N/A	N/A		Blank_4	Met	N/A	N/A
Blank_4	Glu	2407.01	3.49679		Blank_4	Glu	1189.84	3.49751		Blank_4	Glu	N/A	N/A
Blank_4	GSH	N/A	N/A		Blank_4	GSH	N/A	N/A		Blank_4	GSH	N/A	N/A
Blank_4	GSSG	N/A	N/A		Blank_4	GSSG	N/A	N/A		Blank_4	GSSG	N/A	N/A
Blank_4	Cys	783.703	3.74202		Blank_4	Cys	N/A	N/A		Blank_4	Cys	1651.59	3.63925
Blank_4	Lys	2589.4	2.72961		Blank_4	Lys	N/A	N/A		Blank_4	Lys	1003.49	3.03996
Blank_4	His	2835.19	3.04649		Blank_4	His	1784.42	2.97779		Blank_4	His	3509.57	2.90944
Blank_4	Ala	N/A	N/A		Blank_4	Ala	N/A	N/A		Blank_4	Ala	N/A	N/A
Blank_4	Ser	2148.94	3.31803		Blank_4	Ser	N/A	N/A		Blank_4	Ser	N/A	N/A
Blank_4	Asn	1337.41	3.01038		Blank_4	Asn	4421.08	3.28147		Blank_4	Asn	8070.15	3.00104
Blank_4	Thr	N/A	N/A		Blank_4	Thr	N/A	N/A		Blank_4	Thr	N/A	N/A
Blank_4	Pro	N/A	N/A		Blank_4	Pro	1357.48	3.80925		Blank_4	Pro	942.844	4.19399
Blank_4	Val	N/A	N/A		Blank_4	Val	N/A	N/A		Blank_4	Val	N/A	N/A
Blank_4	Leu	N/A	N/A		Blank_4	Leu	N/A	N/A		Blank_4	Leu	1842.51	6.43556
Blank_4	Phe	11350.4	8.86713		Blank_4	Phe	1597.38	8.83308		Blank_4	Phe	1972.96	8.89473
Blank_4	Trp	1538.14	9.9458		Blank_4	Trp	971.247	10.0134		Blank_4	Trp	1480.55	9.97223
Blank_4	Tyr	1573.35	6.72494		Blank_4	Tyr	996.17	6.90611		Blank_4	Tyr	1072.59	6.73989
Blank_4	Gln	1259.1	3.28545		Blank_4	Gln	N/A	N/A		Blank_4	Gln	1288.32	3.70046
Blank_4	Ile	N/A	N/A		Blank_4	Ile	N/A	N/A		Blank_4	Ile	N/A	N/A
Blank_4	Phe_2	35071.6	8.82867		Blank_4	Phe_2	3725.61	8.81391		Blank_4	Phe_2	6426.44	8.80994
Blank_5	Asp	N/A	N/A		Blank_5	Asp	22086.1	3.54019		Blank_5	Asp	22567.5	3.47243
Blank_5	Arg	N/A	N/A		Blank_5	Arg	N/A	N/A		Blank_5	Arg	1855.88	2.80919
Blank_5	SAM	N/A	N/A		Blank_5	SAM	N/A	N/A		Blank_5	SAM	N/A	N/A
Blank_5	SAH	N/A	N/A		Blank_5	SAH	N/A	N/A		Blank_5	SAH	N/A	N/A
Blank_5	Met	N/A	N/A		Blank_5	Met	N/A	N/A		Blank_5	Met	N/A	N/A
Blank_5	Glu	N/A	N/A		Blank_5	Glu	N/A	N/A		Blank_5	Glu	2031.46	3.49402
Blank_5	GSH	N/A	N/A		Blank_5	GSH	N/A	N/A		Blank_5	GSH	N/A	N/A
Blank_5	GSSG	N/A	N/A		Blank_5	GSSG	N/A	N/A		Blank_5	GSSG	N/A	N/A
Blank_5	Cys	N/A	N/A		Blank_5	Cys	N/A	N/A		Blank_5	Cys	2451.86	3.85596
Blank_5	Lys	N/A	N/A		Blank_5	Lys	N/A	N/A		Blank_5	Lys	1230.1	2.78147
Blank_5	His	N/A	N/A		Blank_5	His	1100.72	3.0086		Blank_5	His	N/A	N/A
Blank_5	Ala	N/A	N/A		Blank_5	Ala	938.33	3.56097		Blank_5	Ala	1483.9	3.3575
Blank_5	Ser	N/A	N/A		Blank_5	Ser	N/A	N/A		Blank_5	Ser	N/A	N/A
Blank_5	Asn	N/A	N/A		Blank_5	Asn	3951.34	3.24649		Blank_5	Asn	6225.69	3.79794
Blank_5	Thr	N/A	N/A		Blank_5	Thr	N/A	N/A		Blank_5	Thr	N/A	N/A
Blank_5	Pro	N/A	N/A		Blank_5	Pro	N/A	N/A		Blank_5	Pro	893.556	4.24581
Blank_5	Val	N/A	N/A		Blank_5	Val	N/A	N/A		Blank_5	Val	N/A	N/A
Blank_5	Leu	N/A	N/A		Blank_5	Leu	N/A	N/A		Blank_5	Leu	4934.58	6.62823
Blank_5	Phe	N/A	N/A		Blank_5	Phe	N/A	N/A		Blank_5	Phe	7035.98	9.01122
Blank_5	Trp	N/A	N/A		Blank_5	Trp	1593.11	9.79321		Blank_5	Trp	4462.43	9.94538
Blank_5	Tyr	N/A	N/A		Blank_5	Tyr	1043.08	6.25919		Blank_5	Tyr	2039.69	6.87308
Blank_5	Gln	N/A	N/A		Blank_5	Gln	N/A	N/A		Blank_5	Gln	1152.97	3.33048
Blank_5	Ile	N/A	N/A		Blank_5	Ile	N/A	N/A		Blank_5	Ile	N/A	N/A
Blank_5	Phe_2	N/A	N/A		Blank_5	Phe_2	4036.37	9.0023		Blank_5	Phe_2	15207	8.89887
SB7	Asp	6.59155e+06	3.44042		Blank_6	Asp	48853.5	3.51451		Blank_6	Asp	65552.4	3.61677
SB7	Arg	3.33339e+06	2.89396		Blank_6	Arg	N/A	N/A		Blank_6	Arg	2251.31	2.87912
SB7	SAM	79239.3	2.96135		Blank_6	SAM	N/A	N/A		Blank_6	SAM	N/A	N/A
SB7	SAH	48226.3	6.79902		Blank_6	SAH	N/A	N/A		Blank_6	SAH	N/A	N/A
SB7	Met	23766.4	5.02657		Blank_6	Met	N/A	N/A		Blank_6	Met	N/A	N/A
SB7	Glu	2.71522e+07	3.46418		Blank_6	Glu	N/A	N/A		Blank_6	Glu	2400.37	3.50466
SB7	GSH	1.50106e+06	5.65594		Blank_6	GSH	N/A	N/A		Blank_6	GSH	N/A	N/A
SB7	GSSG	2.00128e+06	6.95817		Blank_6	GSSG	N/A	N/A		Blank_6	GSSG	N/A	N/A
SB7	Cys	13199.1	3.58049		Blank_6	Cys	N/A	N/A		Blank_6	Cys	1477.18	3.68944
SB7	Lys	741516	2.74928		Blank_6	Lys	N/A	N/A		Blank_6	Lys	1566.52	2.95808
SB7	His	25759.6	2.84951		Blank_6	His	N/A	N/A		Blank_6	His	1577.31	2.97794
SB7	Ala	1.7318e+06	3.31819		Blank_6	Ala	N/A	N/A		Blank_6	Ala	1783.72	3.38044
SB7	Ser	4.16533e+06	3.28858		Blank_6	Ser	N/A	N/A		Blank_6	Ser	N/A	N/A
SB7	Asn	2.30245e+06	3.32027		Blank_6	Asn	2862.12	3.35207		Blank_6	Asn	2070.89	2.89242
SB7	Thr	72305.1	3.39949		Blank_6	Thr	N/A	N/A		Blank_6	Thr	2226.12	3.87898
SB7	Pro	3.07581e+06	3.89388		Blank_6	Pro	1136.64	3.63208		Blank_6	Pro	920.981	4.23737
SB7	Val	32895.8	4.25953		Blank_6	Val	N/A	N/A		Blank_6	Val	N/A	N/A
SB7	Leu	7.56075e+06	6.46102		Blank_6	Leu	N/A	N/A		Blank_6	Leu	N/A	N/A
SB7	Phe	2.53278e+06	8.77477		Blank_6	Phe	N/A	N/A		Blank_6	Phe	8358.49	9.03951
SB7	Trp	38436.9	9.91253		Blank_6	Trp	N/A	N/A		Blank_6	Trp	6147.4	9.72483
SB7	Tyr	4.7393e+06	6.70867		Blank_6	Tyr	1836.57	7.08458		Blank_6	Tyr	1305.63	6.31253
SB7	Gln	3.16987e+06	3.39915		Blank_6	Gln	N/A	N/A		Blank_6	Gln	1566.52	2.95808
SB7	Ile	6.32617e+06	6.15746		Blank_6	Ile	N/A	N/A		Blank_6	Ile	N/A	N/A
SB7	Phe_2	9.71849e+06	8.77203		Blank_6	Phe_2	3936.18	8.81632		Blank_6	Phe_2	3587.72	9.13241
SB8	Asp	7.45646e+06	3.45029		SC4	Asp	3.5121e+06	3.4896		Blank_7	Asp	29864.1	3.50836
SB8	Arg	2.51059e+06	2.89644		SC4	Arg	1.55986e+06	2.91393		Blank_7	Arg	1104.35	3.16372
SB8	SAM	14379.2	2.96218		SC4	SAM	51533.7	2.98389		Blank_7	SAM	N/A	N/A
SB8	SAH	38301.1	6.81285		SC4	SAH	18982.2	6.73789		Blank_7	SAH	N/A	N/A
SB8	Met	13137.3	5.03665		SC4	Met	90205.1	4.98873		Blank_7	Met	N/A	N/A
SB8	Glu	2.60667e+07	3.47347		SC4	Glu	1.75387e+07	3.50659		Blank_7	Glu	N/A	N/A
SB8	GSH	2.39719e+06	5.66376		SC4	GSH	2.34464e+06	5.59062		Blank_7	GSH	N/A	N/A
SB8	GSSG	1.43721e+06	6.96908		SC4	GSSG	561603	6.85149		Blank_7	GSSG	N/A	N/A
SB8	Cys	3138.96	3.68183		SC4	Cys	13677.5	3.62435		Blank_7	Cys	1731.38	3.94686
SB8	Lys	763982	2.75592		SC4	Lys	369468	2.79335		Blank_7	Lys	N/A	N/A
SB8	His	131726	2.85306		SC4	His	170571	2.87776		Blank_7	His	N/A	N/A
SB8	Ala	1.88508e+07	3.32603		SC4	Ala	234396	3.3679		Blank_7	Ala	N/A	N/A
SB8	Ser	2.17848e+06	3.29472		SC4	Ser	1.75199e+06	3.33919		Blank_7	Ser	N/A	N/A
SB8	Asn	1.12968e+06	3.3292		SC4	Asn	880988	3.37283		Blank_7	Asn	1473.89	3.41761
SB8	Thr	66794.9	3.40812		SC4	Thr	32603.3	3.44592		Blank_7	Thr	N/A	N/A
SB8	Pro	2.54436e+06	3.90223		SC4	Pro	1.31636e+06	3.95184		Blank_7	Pro	1897.42	3.60725
SB8	Val	30470.3	4.25907		SC4	Val	13291	4.25978		Blank_7	Val	N/A	N/A
SB8	Leu	6.80421e+06	6.46906		SC4	Leu	2.51547e+06	6.3675		Blank_7	Leu	4505.19	6.43792
SB8	Phe	2.44364e+06	8.77962		SC4	Phe	694787	8.70169		Blank_7	Phe	1826.29	8.4642
SB8	Trp	87266.4	9.91518		SC4	Trp	101893	9.85343		Blank_7	Trp	2161.33	10.0535
SB8	Tyr	4.88892e+06	6.71779		SC4	Tyr	1.35565e+06	6.60482		Blank_7	Tyr	1130.35	7.02895
SB8	Gln	2.44624e+06	3.40862		SC4	Gln	2.52921e+06	3.45027		Blank_7	Gln	N/A	N/A
SB8	Ile	5.80371e+06	6.16652		SC4	Ile	2.21607e+06	6.07932		Blank_7	Ile	N/A	N/A
SB8	Phe_2	9.35461e+06	8.77724		SC4	Phe_2	2.57212e+06	8.69876		Blank_7	Phe_2	17953.3	8.97998
SB_5_1	Asp	1.82513e+06	3.44444		SC5	Asp	4.29818e+06	3.49332		Blank_8	Asp	25842.8	3.58541
SB_5_1	Arg	1.6931e+06	2.87552		SC5	Arg	1.77649e+06	2.99658		Blank_8	Arg	4112.64	3.01419
SB_5_1	SAM	31315.3	2.94083		SC5	SAM	4802.11	3.03981		Blank_8	SAM	N/A	N/A
SB_5_1	SAH	9588.86	6.80147		SC5	SAH	12629.9	6.74259		Blank_8	SAH	N/A	N/A
SB_5_1	Met	12768.7	5.03841		SC5	Met	56953.1	5.00471		Blank_8	Met	N/A	N/A
SB_5_1	Glu	5.15664e+06	3.46846		SC5	Glu	1.36121e+07	3.51283		Blank_8	Glu	1104.45	3.50999
SB_5_1	GSH	319439	5.66689		SC5	GSH	120868	5.59144		Blank_8	GSH	N/A	N/A
SB_5_1	GSSG	115073	6.96771		SC5	GSSG	235462	6.85074		Blank_8	GSSG	N/A	N/A
SB_5_1	Cys	13811.5	3.58862		SC5	Cys	2772.38	3.62522		Blank_8	Cys	N/A	N/A
SB_5_1	Lys	363721	2.74814		SC5	Lys	646583	2.81338		Blank_8	Lys	1211.11	2.87629
SB_5_1	His	24236.6	2.84317		SC5	His	18008.2	2.96885		Blank_8	His	N/A	N/A
SB_5_1	Ala	262646	3.32294		SC5	Ala	949098	3.37698		Blank_8	Ala	N/A	N/A
SB_5_1	Ser	723511	3.29203		SC5	Ser	3.10865e+06	3.34844		Blank_8	Ser	N/A	N/A
SB_5_1	Asn	341099	3.32501		SC5	Asn	1.47748e+06	3.38103		Blank_8	Asn	1267.75	3.44408
SB_5_1	Thr	17409.1	3.40585		SC5	Thr	71093.8	3.45612		Blank_8	Thr	N/A	N/A
SB_5_1	Pro	469686	3.89856		SC5	Pro	2.47261e+06	3.95737		Blank_8	Pro	1572.54	3.85325
SB_5_1	Val	11475.9	4.26038		SC5	Val	45286.3	4.27461		Blank_8	Val	N/A	N/A
SB_5_1	Leu	2.74324e+06	6.47253		SC5	Leu	1.0435e+07	6.37216		Blank_8	Leu	6668.52	6.52405
SB_5_1	Phe	921725	8.78203		SC5	Phe	2.69805e+06	8.70597		Blank_8	Phe	4168.16	8.92886
SB_5_1	Trp	23630.2	9.91929		SC5	Trp	98774.8	9.8591		Blank_8	Trp	3058.75	9.67806
SB_5_1	Tyr	1.62833e+06	6.7174		SC5	Tyr	4.54963e+06	6.6093		Blank_8	Tyr	5318.39	6.886
SB_5_1	Gln	424788	3.39938		SC5	Gln	2.24773e+06	3.45471		Blank_8	Gln	N/A	N/A
SB_5_1	Ile	2.2355e+06	6.16743		SC5	Ile	8.27392e+06	6.08212		Blank_8	Ile	N/A	N/A
SB_5_1	Phe_2	3.52426e+06	8.7796		SC5	Phe_2	9.80618e+06	8.70398		Blank_8	Phe_2	8524.09	8.85196
SB_6_1	Asp	404407	3.45142		SC6	Asp	4.41031e+06	3.47859		SC2	Asp	4.13348e+06	3.47981
SB_6_1	Arg	2.35119e+06	2.88458		SC6	Arg	2.51942e+06	2.9431		SC2	Arg	2.53703e+06	2.94158
SB_6_1	SAM	N/A	N/A		SC6	SAM	4447.1	2.99174		SC2	SAM	15127.1	3.00804
SB_6_1	SAH	N/A	N/A		SC6	SAH	4285.22	6.72335		SC2	SAH	9220.3	6.76256
SB_6_1	Met	1806.51	5.05591		SC6	Met	1884.12	4.98264		SC2	Met	11777.6	5.00091
SB_6_1	Glu	1.05567e+06	3.47267		SC6	Glu	1.23442e+07	3.49541		SC2	Glu	1.50445e+07	3.50277
SB_6_1	GSH	5357.42	5.66344		SC6	GSH	1.54408e+06	5.57482		SC2	GSH	113420	5.58722
SB_6_1	GSSG	929.078	6.96201		SC6	GSSG	347680	6.83068		SC2	GSSG	500801	6.85132
SB_6_1	Cys	4005.2	3.60981		SC6	Cys	N/A	N/A		SC2	Cys	8850.66	3.6573
SB_6_1	Lys	390642	2.75704		SC6	Lys	732892	2.79083		SC2	Lys	659559	2.80072
SB_6_1	His	77694.4	2.85603		SC6	His	97434.2	2.91554		SC2	His	38956.7	2.91286
SB_6_1	Ala	2.93616e+06	3.32805		SC6	Ala	9.88022e+06	3.35898		SC2	Ala	404908	3.36903
SB_6_1	Ser	355549	3.29898		SC6	Ser	1.69164e+06	3.32849		SC2	Ser	2.88998e+06	3.33722
SB_6_1	Asn	210423	3.33324		SC6	Asn	904700	3.36419		SC2	Asn	1.38112e+06	3.37263
SB_6_1	Thr	12822.1	3.41292		SC6	Thr	60046.5	3.44021		SC2	Thr	59093.6	3.44748
SB_6_1	Pro	460237	3.90597		SC6	Pro	2.43548e+06	3.94082		SC2	Pro	1.95231e+06	3.96325
SB_6_1	Val	11576.5	4.26666		SC6	Val	39860.6	4.25811		SC2	Val	29306	4.27138
SB_6_1	Leu	2.80624e+06	6.47475		SC6	Leu	9.14931e+06	6.35378		SC2	Leu	5.60471e+06	6.37616
SB_6_1	Phe	961007	8.78696		SC6	Phe	2.25965e+06	8.69098		SC2	Phe	1.40475e+06	8.7135
SB_6_1	Trp	27035.7	9.92409		SC6	Trp	50091.4	9.84212		SC2	Trp	23487.1	9.89796
SB_6_1	Tyr	1.72932e+06	6.72127		SC6	Tyr	4.67057e+06	6.59211		SC2	Tyr	2.42197e+06	6.65008
SB_6_1	Gln	472530	3.40725		SC6	Gln	1.73281e+06	3.44082		SC2	Gln	2.11207e+06	3.4487
SB_6_1	Ile	2.44505e+06	6.17056		SC6	Ile	7.89364e+06	6.06631		SC2	Ile	5.00777e+06	6.0897
SB_6_1	Phe_2	3.67838e+06	8.78441		SC6	Phe_2	8.32985e+06	8.68847		SC2	Phe_2	5.29917e+06	8.71126
SC1	Asp	2.39701e+06	3.46106		SC7	Asp	5.31995e+06	3.47721		SC5	Asp	3.62525e+06	3.48982
SC1	Arg	2.53833e+06	2.89715		SC7	Arg	2.49121e+06	2.9284		SC5	Arg	1.71074e+06	2.99843
SC1	SAM	82220.5	2.9685		SC7	SAM	104416	2.98715		SC5	SAM	7322.55	3.04945
SC1	SAH	13034.6	6.81862		SC7	SAH	61535.3	6.72777		SC5	SAH	12795.8	6.76108
SC1	Met	158210	5.05692		SC7	Met	238479	4.98195		SC5	Met	56991.7	5.00293
SC1	Glu	1.80126e+07	3.48491		SC7	Glu	2.66948e+07	3.49555		SC5	Glu	1.18635e+07	3.51267
SC1	GSH	222362	5.68674		SC7	GSH	6.08636e+06	5.57501		SC5	GSH	28592.1	5.59556
SC1	GSSG	1.07141e+06	6.98557		SC7	GSSG	1.69976e+06	6.8333		SC5	GSSG	179465	6.84422
SC1	Cys	21699	3.59868		SC7	Cys	24992.1	3.61192		SC5	Cys	3011.29	3.642
SC1	Lys	477225	2.76561		SC7	Lys	654704	2.78533		SC5	Lys	659608	2.82127
SC1	His	158553	2.86094		SC7	His	212676	2.89173		SC5	His	18292.1	2.97508
SC1	Ala	249692	3.33743		SC7	Ala	540609	3.3573		SC5	Ala	906259	3.38061
SC1	Ser	1.29788e+06	3.30909		SC7	Ser	3.56101e+06	3.32724		SC5	Ser	2.89704e+06	3.34989
SC1	Asn	666018	3.3406		SC7	Asn	1.60209e+06	3.35954		SC5	Asn	1.2413e+06	3.38331
SC1	Thr	25580.9	3.41863		SC7	Thr	73359.8	3.43731		SC5	Thr	59014	3.45784
SC1	Pro	922591	3.91507		SC7	Pro	2.87811e+06	3.93997		SC5	Pro	2.21254e+06	3.97055
SC1	Val	14799	4.27695		SC7	Val	33920.7	4.24659		SC5	Val	40426.1	4.27963
SC1	Leu	3.36974e+06	6.49012		SC7	Leu	6.77875e+06	6.35508		SC5	Leu	9.91249e+06	6.37964
SC1	Phe	1.18112e+06	8.79667		SC7	Phe	1.61749e+06	8.68762		SC5	Phe	2.69724e+06	8.71875
SC1	Trp	249172	9.93423		SC7	Trp	290913	9.84137		SC5	Trp	110867	9.90638
SC1	Tyr	2.50496e+06	6.73588		SC7	Tyr	4.36106e+06	6.59035		SC5	Tyr	4.50919e+06	6.64881
SC1	Gln	2.4533e+06	3.41858		SC7	Gln	6.55688e+06	3.43707		SC5	Gln	1.98392e+06	3.45783
SC1	Ile	2.95475e+06	6.18653		SC7	Ile	5.84106e+06	6.06603		SC5	Ile	7.78092e+06	6.0939
SC1	Phe_2	4.41705e+06	8.79519		SC7	Phe_2	5.90104e+06	8.68519		SC5	Phe_2	9.96312e+06	8.71705
SC2	Asp	2.60731e+06	3.46854		SC8	Asp	8.04466e+06	3.46704		SC14	Asp	6.21766e+06	3.49175
SC2	Arg	2.24515e+06	2.91219		SC8	Arg	1.88854e+06	2.91628		SC14	Arg	1.89026e+06	2.96452
SC2	SAM	23460.5	2.97992		SC8	SAM	33169.8	2.97528		SC14	SAM	14386.3	3.02645
SC2	SAH	8062.91	6.83501		SC8	SAH	31520.2	6.7154		SC14	SAH	26346.9	6.77947
SC2	Met	7788.21	5.07139		SC8	Met	20460.6	4.97784		SC14	Met	18462.3	5.01052
SC2	Glu	1.10107e+07	3.49127		SC8	Glu	1.83109e+07	3.4851		SC14	Glu	1.83447e+07	3.51496
SC2	GSH	58489.5	5.70002		SC8	GSH	4.61806e+06	5.56215		SC14	GSH	2.09835e+06	5.60628
SC2	GSSG	495486	6.99311		SC8	GSSG	904065	6.8217		SC14	GSSG	1.16607e+06	6.86842
SC2	Cys	7992.09	3.65128		SC8	Cys	4048.36	3.59755		SC14	Cys	40002.2	3.63014
SC2	Lys	418400	2.77464		SC8	Lys	593506	2.77425		SC14	Lys	644926	2.81541
SC2	His	13696.3	2.88741		SC8	His	30858.6	2.87378		SC14	His	39364.2	2.93325
SC2	Ala	270434	3.34328		SC8	Ala	868545	3.34748		SC14	Ala	643034	3.38177
SC2	Ser	1.42426e+06	3.31609		SC8	Ser	4.86729e+06	3.31732		SC14	Ser	3.82219e+06	3.35109
SC2	Asn	700618	3.34767		SC8	Asn	2.36567e+06	3.35203		SC14	Asn	1.75277e+06	3.38424
SC2	Thr	27374.1	3.42666		SC8	Thr	89710.4	3.42561		SC14	Thr	74871	3.45846
SC2	Pro	953957	3.92187		SC8	Pro	3.36536e+06	3.9308		SC14	Pro	2.49123e+06	3.97345
SC2	Val	16728.5	4.29064		SC8	Val	27973.4	4.23952		SC14	Val	33784.5	4.28024
SC2	Leu	3.61462e+06	6.49603		SC8	Leu	6.02625e+06	6.3424		SC14	Leu	7.11045e+06	6.39403
SC2	Phe	1.0929e+06	8.80293		SC8	Phe	1.44777e+06	8.6779		SC14	Phe	1.77594e+06	8.72608
SC2	Trp	17131.7	9.93608		SC8	Trp	38856.2	9.83441		SC14	Trp	43820.1	9.90963
SC2	Tyr	1.94724e+06	6.74335		SC8	Tyr	2.80542e+06	6.57823		SC14	Tyr	3.45851e+06	6.66587
SC2	Gln	1.29035e+06	3.42385		SC8	Gln	2.78219e+06	3.42843		SC14	Gln	2.05011e+06	3.45925
SC2	Ile	3.08914e+06	6.19214		SC8	Ile	4.95577e+06	6.05286		SC14	Ile	6.18885e+06	6.10953
SC2	Phe_2	4.14402e+06	8.80119		SC8	Phe_2	5.28545e+06	8.67516		SC14	Phe_2	6.85049e+06	8.72474
SC3	Asp	2.47948e+06	3.46926		SC9	Asp	5.37048e+06	3.47481		SC15	Asp	3.3056e+06	3.47304
SC3	Arg	2.32924e+06	2.92917		SC9	Arg	2.63443e+06	2.93089		SC15	Arg	2.19645e+06	2.94241
SC3	SAM	6094.54	2.98855		SC9	SAM	136131	2.99156		SC15	SAM	15573.2	2.99956
SC3	SAH	3935.77	6.827		SC9	SAH	39542.4	6.72718		SC15	SAH	16319.8	6.76243
SC3	Met	1716.92	5.05773		SC9	Met	269171	4.98017		SC15	Met	15230.5	4.99181
SC3	Glu	8.18663e+06	3.49135		SC9	Glu	2.97656e+07	3.49405		SC15	Glu	9.92505e+06	3.49458
SC3	GSH	285393	5.69483		SC9	GSH	5.40851e+06	5.56924		SC15	GSH	561867	5.58208
SC3	GSSG	328220	6.99399		SC9	GSSG	2.23749e+06	6.82849		SC15	GSSG	394198	6.84497
SC3	Cys	5310.36	3.82333		SC9	Cys	27788.1	3.60689		SC15	Cys	27081.3	3.61401
SC3	Lys	539167	2.77815		SC9	Lys	694487	2.78415		SC15	Lys	641166	2.79544
SC3	His	81387.8	2.89683		SC9	His	209964	2.89445		SC15	His	35343.4	2.91257
SC3	Ala	7.49515e+06	3.34656		SC9	Ala	555698	3.35449		SC15	Ala	390391	3.3614
SC3	Ser	876968	3.31658		SC9	Ser	3.85994e+06	3.32476		SC15	Ser	2.75172e+06	3.32859
SC3	Asn	475448	3.34951		SC9	Asn	1.80789e+06	3.35755		SC15	Asn	1.13429e+06	3.36406
SC3	Thr	31629.9	3.42744		SC9	Thr	68901.3	3.43218		SC15	Thr	55612.6	3.43774
SC3	Pro	1.16905e+06	3.92221		SC9	Pro	3.64566e+06	3.9376		SC15	Pro	1.69183e+06	3.9539
SC3	Val	27083.9	4.28805		SC9	Val	33109.5	4.24677		SC15	Val	36671.5	4.26063
SC3	Leu	5.78622e+06	6.49692		SC9	Leu	7.14199e+06	6.34821		SC15	Leu	6.88727e+06	6.37086
SC3	Phe	1.80101e+06	8.80412		SC9	Phe	1.74795e+06	8.68416		SC15	Phe	1.63247e+06	8.70451
SC3	Trp	53345.9	9.93817		SC9	Trp	326958	9.83761		SC15	Trp	41337.6	9.89241
SC3	Tyr	3.52247e+06	6.74533		SC9	Tyr	4.29111e+06	6.58461		SC15	Tyr	3.15378e+06	6.64211
SC3	Gln	1.19782e+06	3.42538		SC9	Gln	7.15615e+06	3.43382		SC15	Gln	1.43724e+06	3.44082
SC3	Ile	5.04001e+06	6.19424		SC9	Ile	6.38815e+06	6.06022		SC15	Ile	5.80622e+06	6.0862
SC3	Phe_2	6.73323e+06	8.80209		SC9	Phe_2	6.33428e+06	8.68179		SC15	Phe_2	6.13803e+06	8.70162
					SC10	Asp	6.95049e+06	3.49058		SC16	Asp	4.58368e+06	3.46531
					SC10	Arg	2.09076e+06	2.94933		SC16	Arg	1.78512e+06	2.92972
					SC10	SAM	32527.1	3.0021		SC16	SAM	22585.1	2.98858
					SC10	SAH	26345.9	6.73433		SC16	SAH	21519.7	6.74968
					SC10	Met	16535.9	5.00055		SC16	Met	15409.9	4.97814
					SC10	Glu	1.61973e+07	3.508		SC16	Glu	1.45954e+07	3.48732
					SC10	GSH	1.8745e+06	5.58524		SC16	GSH	2.98751e+06	5.5759
					SC10	GSSG	1.18205e+06	6.84304		SC16	GSSG	567773	6.83666
					SC10	Cys	8750.21	3.63092		SC16	Cys	47852.8	3.60629
					SC10	Lys	589682	2.80016		SC16	Lys	584920	2.78641
					SC10	His	22842.6	2.92015		SC16	His	42280.5	2.90083
					SC10	Ala	729406	3.37113		SC16	Ala	568702	3.35454
					SC10	Ser	3.80738e+06	3.34132		SC16	Ser	3.77955e+06	3.32239
					SC10	Asn	1.88611e+06	3.37482		SC16	Asn	1.64049e+06	3.35768
					SC10	Thr	75125.8	3.45009		SC16	Thr	73865.1	3.4307
					SC10	Pro	2.41583e+06	3.95314		SC16	Pro	2.29494e+06	3.9463
					SC10	Val	29617.5	4.26629		SC16	Val	28088.5	4.25164
					SC10	Leu	6.60664e+06	6.36436		SC16	Leu	5.76279e+06	6.36329
					SC10	Phe	1.50736e+06	8.69889		SC16	Phe	1.39094e+06	8.69737
					SC10	Trp	33071.8	9.85184		SC16	Trp	51991.3	9.87848
					SC10	Tyr	3.10252e+06	6.59975		SC16	Tyr	2.70706e+06	6.6349
					SC10	Gln	2.24792e+06	3.45242		SC16	Gln	1.75268e+06	3.43381
					SC10	Ile	5.56212e+06	6.07532		SC16	Ile	4.83714e+06	6.07893
					SC10	Phe_2	5.37371e+06	8.69745		SC16	Phe_2	5.13827e+06	8.69603
					SC11	Asp	1.58257e+06	3.46732		SC17	Asp	4.94959e+06	3.46662
					SC11	Arg	3.46597e+06	2.9296		SC17	Arg	2.37612e+06	2.95154
					SC11	SAM	36073	2.97685		SC17	SAM	18275.6	3.00155
					SC11	SAH	16837.4	6.70858		SC17	SAH	13126.9	6.73726
					SC11	Met	317733	4.97664		SC17	Met	24148.9	4.9827
					SC11	Glu	9.84265e+06	3.48426		SC17	Glu	1.26978e+07	3.48963
					SC11	GSH	474705	5.56055		SC17	GSH	4.8538e+06	5.57192
					SC11	GSSG	62192.1	6.81241		SC17	GSSG	37691.6	6.82902
					SC11	Cys	67208	3.59913		SC17	Cys	43289.4	3.6061
					SC11	Lys	875654	2.77893		SC17	Lys	805713	2.7925
					SC11	His	237673	2.90297		SC17	His	27171	2.92616
					SC11	Ala	232777	3.34713		SC17	Ala	555979	3.35724
					SC11	Ser	2.23425e+06	3.31775		SC17	Ser	3.4967e+06	3.32437
					SC11	Asn	890046	3.35132		SC17	Asn	1.54563e+06	3.35977
					SC11	Thr	50915.9	3.42825		SC17	Thr	77576.2	3.43335
					SC11	Pro	1.39144e+06	3.93084		SC17	Pro	2.17922e+06	3.94821
					SC11	Val	47988.6	4.24303		SC17	Val	46003.4	4.25342
					SC11	Leu	9.38881e+06	6.33808		SC17	Leu	7.40702e+06	6.35764
					SC11	Phe	2.24505e+06	8.67549		SC17	Phe	1.8635e+06	8.69511
					SC11	Trp	359977	9.82906		SC17	Trp	33568.5	9.87795
					SC11	Tyr	5.38707e+06	6.57543		SC17	Tyr	3.94736e+06	6.63171
					SC11	Gln	5.12194e+06	3.4256		SC17	Gln	1.83405e+06	3.43606
					SC11	Ile	8.13495e+06	6.04995		SC17	Ile	6.98787e+06	6.07204
					SC11	Phe_2	8.17214e+06	8.67353		SC17	Phe_2	6.94109e+06	8.69373
					SC12	Asp	1.31341e+06	3.46748		SC18	Asp	3.49337e+06	3.47041
					SC12	Arg	2.40448e+06	2.92721		SC18	Arg	2.98228e+06	2.94272
					SC12	SAM	8622.19	2.97962		SC18	SAM	42126.1	3.00029
					SC12	SAH	9582.34	6.71561		SC18	SAH	13017.6	6.74165
					SC12	Met	18068.4	4.97102		SC18	Met	270644	4.98218
					SC12	Glu	3.1557e+06	3.48561		SC18	Glu	1.96249e+07	3.49379
					SC12	GSH	60845.9	5.56468		SC18	GSH	7.41667e+06	5.57172
					SC12	GSSG	64563.8	6.81682		SC18	GSSG	52065.8	6.83339
					SC12	Cys	13457	3.60507		SC18	Cys	175498	3.60964
					SC12	Lys	598780	2.77933		SC18	Lys	775979	2.79307
					SC12	His	27335.4	2.90238		SC18	His	221808	2.91057
					SC12	Ala	172031	3.34891		SC18	Ala	417677	3.35892
					SC12	Ser	1.48781e+06	3.31969		SC18	Ser	2.67126e+06	3.32708
					SC12	Asn	681296	3.3542		SC18	Asn	1.4438e+06	3.36096
					SC12	Thr	36922	3.4315		SC18	Thr	61493.2	3.43648
					SC12	Pro	990242	3.93242		SC18	Pro	1.94171e+06	3.95266
					SC12	Val	31258.3	4.24231		SC18	Val	38317.6	4.25506
					SC12	Leu	6.71478e+06	6.34173		SC18	Leu	5.85376e+06	6.35793
					SC12	Phe	1.49642e+06	8.67745		SC18	Phe	1.59099e+06	8.69787
					SC12	Trp	20483	9.82943		SC18	Trp	292289	9.88176
					SC12	Tyr	2.88159e+06	6.57741		SC18	Tyr	3.88939e+06	6.6299
					SC12	Gln	1.08562e+06	3.42648		SC18	Gln	4.57115e+06	3.43851
					SC12	Ile	5.63143e+06	6.05219		SC18	Ile	5.71256e+06	6.07085
					SC12	Phe_2	5.49864e+06	8.67532		SC18	Phe_2	5.88685e+06	8.6951
					SC13	Asp	2.22757e+06	3.46758
					SC13	Arg	1.87426e+06	2.91907
					SC13	SAM	6375.74	2.9779
					SC13	SAH	14925.9	6.71207
					SC13	Met	4586.47	4.9682
					SC13	Glu	7.10455e+06	3.48533
					SC13	GSH	1.57144e+06	5.56185
					SC13	GSSG	262855	6.81497
					SC13	Cys	2378.22	3.59873
					SC13	Lys	591884	2.77806
					SC13	His	87963.4	2.89326
					SC13	Ala	5.73685e+06	3.34851
					SC13	Ser	1.15331e+06	3.31711
					SC13	Asn	584777	3.35304
					SC13	Thr	42059.1	3.4293
					SC13	Pro	1.40248e+06	3.93124
					SC13	Val	26044	4.24339
					SC13	Leu	5.78276e+06	6.33951
					SC13	Phe	1.4576e+06	8.6758
					SC13	Trp	40223.6	9.83048
					SC13	Tyr	2.97271e+06	6.57602
					SC13	Gln	1.04863e+06	3.42855
					SC13	Ile	5.0513e+06	6.05002
					SC13	Phe_2	5.25366e+06	8.67329
					Std	Asp	3.60529e+06	3.4745
					Std	Arg	8.87029e+06	2.88094
					Std	SAM	N/A	N/A
					Std	SAH	N/A	N/A
					Std	Met	N/A	N/A
					Std	Glu	9.7285e+06	3.49091
					Std	GSH	N/A	N/A
					Std	GSSG	N/A	N/A
					Std	Cys	1835.1	3.79452
					Std	Lys	8.61185e+06	2.78223
					Std	His	1.43351e+07	2.84558
					Std	Ala	2.71891e+06	3.35211
					Std	Ser	5.31753e+06	3.32251
					Std	Asn	2.00669e+06	3.35737
					Std	Thr	269291	3.4337
					Std	Pro	6.3453e+06	3.94107
					Std	Val	197376	4.24911
					Std	Leu	1.83257e+07	6.36488
					Std	Phe	1.84575e+07	8.6888
					Std	Trp	1.07157e+07	9.83564
					Std	Tyr	8915.75	6.6148
					Std	Gln	4.20613e+06	3.432
					Std	Ile	1.52424e+07	6.07675
					Std	Phe_2	6.92554e+07	8.68582

## Sheet: Steady state processed data
Processed n=1 part 1	Area		Area (Realtive to T0)			processed n=1 part2	SC7(Area)	SC8(Area)	SC10(Area)	Realtive to T0 (Area)	SC7/SC7	SC8/SC7	SC10/SC7	compiled processed data n=1						processed n=2											n=1 and 2 compiled			n=1	n=2				n=1	n=2				n=1	n=2
Samples	T0(SC1)	CMDS-IL2 (1 hr)(SC2)	T0(SC1/SC1)	CMDS-IL2 (1 hr)(SC1/SC2)		Samples	T0	CMDS-IL2 (3hr)	CMDS-IL2 (6hr)	Samples	T0	CMDS-IL-2 (3hr)	CMDS-IL2 (6hr)		T0	CMDS-IL2 (1 hr)	CMDS-IL2 (3hr)	CMDS-IL2 (6hr)			Area				Relative to T0 (Area)						Samples	T0 (n=1)	T0(n=2)	CMDS-IL2 (1hr)	CMDS-IL2 (1hr)	Average 1 h	SD	p value	CMDS-IL2 (3hr)	CMDS-IL2 (3hr)	Average 3 h	SD	p value	CMDS-IL2 (6hr)	CMDS-IL2 (6hr)	Average 6 h	SD	p value
Asp	2.39701e+06	2.60731e+06	1	1.08773		Asp	5.31995e+06	8.04466e+06	6.95049e+06	Asp	1	1.51217	1.30649	Asp	1	1.08773	1.51217	1.30649			SC18	SC14	SC16	SC17		SC18/SC18	SC14/SC18	SC16/SC18	SC17/SC18		Met	1	1	0.049227	0.068216	0.0587215	0.0134273	0.000101728	0.0857962	0.056938	0.0713671	0.0204058	0.000241342	0.069339	0.0892276	0.0792833	0.0140634	0.000116633
Arg	2.53833e+06	2.24515e+06	1	0.884499		Arg	2.49121e+06	1.88854e+06	2.09076e+06	Arg	1	0.758083	0.839255	Arg	1	0.884499	0.758083	0.839255		Samples	T0	CMDS-IL2 (1hr)	CMDS-IL2 (3hr)	CMDS-IL2 (6hr)	Samples	T0	CMDS-IL2 (1hr)	CMDS-IL2 (3hr)	CMDS-IL2 (6hr)		Cys	1	1	0.368316	0.227935	0.298125	0.0992646	0.00985335	0.161986	0.272668	0.217327	0.0782642	0.00496242	0.35012	0.246666	0.298393	0.0731532	0.00539169
SAM	82220.5	23460.5	1	0.285336		SAM	104416	33169.8	32527.1	SAM	1	0.317669	0.311513	SAM	1	0.285336	0.317669	0.311513		Asp	3.49337e+06	6.21766e+06	4.58368e+06	4.94959e+06	Asp	1	1.77985	1.31211	1.41685		His	1	1	0.086383	0.17747	0.131927	0.0644084	0.00274128	0.145097	0.190618	0.167857	0.0321884	0.000747284	0.107406	0.122498	0.114952	0.010672	7.26916e-05
SAH	13034.6	8062.91	1	0.618579		SAH	61535.3	31520.2	26345.9	SAH	1	0.512229	0.428143	SAH	1	0.618579	0.512229	0.428143		Arg	2.98228e+06	1.89026e+06	1.78512e+06	2.37612e+06	Arg	1	0.63383	0.598574	0.796745		Trp	1	1	0.0687547	0.14992	0.109338	0.0573929	0.00206971	0.133567	0.177876	0.155721	0.0313317	0.000687889	0.113683	0.114847	0.114265	0.000823063	4.31746e-07
Met	158210	7788.21	1	0.049227		Met	238479	20460.6	16535.9	Met	1	0.0857962	0.069339	Met	1	0.049227	0.0857962	0.069339		SAM	42126.1	14386.3	22585.1	18275.6	SAM	1	0.341506	0.536132	0.43383		Asp	1	1	1.08773	1.77985	1.43379	0.489397	0.336686	1.51217	1.31211	1.41214	0.141462	0.0541651	1.30649	1.41685	1.36167	0.0780364	0.0224947
Glu	1.80126e+07	1.10107e+07	1	0.611279		Glu	2.66948e+07	1.83109e+07	1.61973e+07	Glu	1	0.685936	0.606758	Glu	1	0.611279	0.685936	0.606758		SAH	13017.6	26346.9	21519.7	13126.9	SAH	1	2.02395	1.65312	1.0084		Arg	1	1	0.884499	0.63383	0.759164	0.177249	0.194611	0.758083	0.598574	0.678328	0.11279	0.0563288	0.839255	0.796745	0.818	0.0300593	0.0133662
Cys	21699	7992.09	1	0.368316		Cys	24992.1	4048.36	8750.21	Cys	1	0.161986	0.35012	Cys	1	0.368316	0.161986	0.35012		Met	270644	18462.3	15409.9	24148.9	Met	1	0.068216	0.056938	0.0892276		Glu	1	1	0.611279	0.934768	0.773023	0.228742	0.295637	0.685936	0.743721	0.714829	0.0408605	0.0101097	0.606758	0.647027	0.626892	0.0284741	0.0028994
Lys	477225	418400	1	0.876735		Lys	654704	593506	589682	Lys	1	0.906526	0.900685	Lys	1	0.876735	0.906526	0.900685		Glu	1.96249e+07	1.83447e+07	1.45954e+07	1.26978e+07	Glu	1	0.934768	0.743721	0.647027		Lys	1	1	0.876735	0.831113	0.853924	0.0322602	0.0235291	0.906526	0.753783	0.830154	0.108006	0.156163	0.900685	1.03832	0.969502	0.097322	0.700964
His	158553	13696.3	1	0.086383		His	212676	30858.6	22842.6	His	1	0.145097	0.107406	His	1	0.086383	0.145097	0.107406		Cys	175498	40002.2	47852.8	43289.4	Cys	1	0.227935	0.272668	0.246666		Ala	1	1	1.08307	1.53955	1.31131	0.322779	0.305799	1.6066	1.36158	1.48409	0.173257	0.0584839	1.34923	1.33112	1.34018	0.0128052	0.00070774
Ala	249692	270434	1	1.08307		Ala	540609	868545	729406	Ala	1	1.6066	1.34923	Ala	1	1.08307	1.6066	1.34923		Lys	775979	644926	584920	805713	Lys	1	0.831113	0.753783	1.03832		Ser	1	1	1.09737	1.43086	1.26411	0.235808	0.254049	1.36683	1.4149	1.39086	0.0339892	0.0037597	1.06918	1.30901	1.1891	0.169582	0.255522
Ser	1.29788e+06	1.42426e+06	1	1.09737		Ser	3.56101e+06	4.86729e+06	3.80738e+06	Ser	1	1.36683	1.06918	Ser	1	1.09737	1.36683	1.06918		His	221808	39364.2	42280.5	27171	His	1	0.17747	0.190618	0.122498		Asn	1	1	1.05195	1.214	1.13298	0.114588	0.242461	1.47661	1.13623	1.30642	0.240685	0.213588	1.17728	1.07053	1.1239	0.0754817	0.14599
Asn	666018	700618	1	1.05195		Asn	1.60209e+06	2.36567e+06	1.88611e+06	Asn	1	1.47661	1.17728	Asn	1	1.05195	1.47661	1.17728		Ala	417677	643034	568702	555979	Ala	1	1.53955	1.36158	1.33112		Thr	1	1	1.0701	1.21755	1.14382	0.104264	0.190368	1.22288	1.20119	1.21204	0.0153384	0.00260617	1.02407	1.26154	1.14281	0.167916	0.352143
Thr	25580.9	27374.1	1	1.0701		Thr	73359.8	89710.4	75125.8	Thr	1	1.22288	1.02407	Thr	1	1.0701	1.22288	1.02407		Ser	2.67126e+06	3.82219e+06	3.77955e+06	3.4967e+06	Ser	1	1.43086	1.4149	1.30901		Pro	1	1	1.034	1.28301	1.1585	0.176079	0.330958	1.1693	1.18192	1.17561	0.00892734	0.00128969	0.839379	1.12232	0.98085	0.20007	0.904716
Pro	922591	953957	1	1.034		Pro	2.87811e+06	3.36536e+06	2.41583e+06	Pro	1	1.1693	0.839379	Pro	1	1.034	1.1693	0.839379		Asn	1.4438e+06	1.75277e+06	1.64049e+06	1.54563e+06	Asn	1	1.214	1.13623	1.07053		Val	1	1	1.13038	0.881696	1.00604	0.175846	0.965684	0.824672	0.733045	0.778858	0.0647902	0.0403397	0.873141	1.20058	1.03686	0.231536	0.842776
Val	14799	16728.5	1	1.13038		Val	33920.7	27973.4	29617.5	Val	1	0.824672	0.873141	Val	1	1.13038	0.824672	0.873141		Thr	61493.2	74871	73865.1	77576.2	Thr	1	1.21755	1.20119	1.26154		Leu	1	1	1.07267	1.21468	1.14368	0.100415	0.180346	0.888992	0.984459	0.936726	0.0675054	0.316127	0.974611	1.26534	1.11998	0.205579	0.495954
Leu	3.36974e+06	3.61462e+06	1	1.07267		Leu	6.77875e+06	6.02625e+06	6.60664e+06	Leu	1	0.888992	0.974611	Leu	1	1.07267	0.888992	0.974611		Pro	1.94171e+06	2.49123e+06	2.29494e+06	2.17922e+06	Pro	1	1.28301	1.18192	1.12232		Phe	1	1	0.925309	1.11625	1.02078	0.135012	0.847899	0.895071	0.874259	0.884665	0.0147167	0.00804269	0.931914	1.17128	1.0516	0.16926	0.708399
Phe	1.18112e+06	1.0929e+06	1	0.925309		Phe	1.61749e+06	1.44777e+06	1.50736e+06	Phe	1	0.895071	0.931914	Phe	1	0.925309	0.895071	0.931914		Val	38317.6	33784.5	28088.5	46003.4	Val	1	0.881696	0.733045	1.20058		Tyr	1	1	0.777354	0.889215	0.833284	0.079098	0.0965295	0.643287	0.696011	0.669649	0.0372811	0.00630771	0.711413	1.0149	0.863159	0.214601	0.46235
Trp	249172	17131.7	1	0.0687547		Trp	290913	38856.2	33071.8	Trp	1	0.133567	0.113683	Trp	1	0.0687547	0.133567	0.113683		Leu	5.85376e+06	7.11045e+06	5.76279e+06	7.40702e+06	Leu	1	1.21468	0.984459	1.26534		Gln	1	1	0.525964	0.448489	0.487227	0.0547833	0.0056587	0.424315	0.383423	0.403869	0.0289155	0.00117431	0.342834	0.401224	0.372029	0.0412875	0.00215438
Tyr	2.50496e+06	1.94724e+06	1	0.777354		Tyr	4.36106e+06	2.80542e+06	3.10252e+06	Tyr	1	0.643287	0.711413	Tyr	1	0.777354	0.643287	0.711413		Phe	1.59099e+06	1.77594e+06	1.39094e+06	1.8635e+06	Phe	1	1.11625	0.874259	1.17128		Ile	1	1	1.04548	1.08338	1.06443	0.0267945	0.0766647	0.848436	0.846755	0.847595	0.00118826	3.03933e-05	0.952245	1.22325	1.08775	0.191627	0.583672
Gln	2.4533e+06	1.29035e+06	1	0.525964		Gln	6.55688e+06	2.78219e+06	2.24792e+06	Gln	1	0.424315	0.342834	Gln	1	0.525964	0.424315	0.342834		Trp	292289	43820.1	51991.3	33568.5	Trp	1	0.14992	0.177876	0.114847		SAM	1	1	0.285336	0.341506	0.313421	0.039718	0.00166907	0.317669	0.536132	0.4269	0.154477	0.0344607	0.311513	0.43383	0.372672	0.086491	0.00937096
Ile	2.95475e+06	3.08914e+06	1	1.04548		Ile	5.84106e+06	4.95577e+06	5.56212e+06	Ile	1	0.848436	0.952245	Ile	1	1.04548	0.848436	0.952245		Tyr	3.88939e+06	3.45851e+06	2.70706e+06	3.94736e+06	Tyr	1	0.889215	0.696011	1.0149		SAH	1	1	0.618579	2.02395	1.32126	0.993745	0.69239	0.512229	1.65312	1.08267	0.806732	0.898053	0.428143	1.0084	0.718271	0.410302	0.433954
																				Gln	4.57115e+06	2.05011e+06	1.75268e+06	1.83405e+06	Gln	1	0.448489	0.383423	0.401224		Cys	1	1	0.368316	0.227935	0.298125	0.0992646	0.00985335	0.161986	0.272668	0.217327	0.0782642	0.00496242	0.35012	0.246666	0.298393	0.0731532	0.00539169
																				Ile	5.71256e+06	6.18885e+06	4.83714e+06	6.98787e+06	Ile	1	1.08338	0.846755	1.22325

## Sheet: labeled peak raw areas 
n=1				n=2				n-3
Sample Name	Component Name	Area		Sample Name	Component Name	Area		Sample Name	Component Name	IS Name	IS Actual Concentration	Area	IS Area	Area Ratio	Retention Time
Blank_1	Met	N/A		Blank_1	Met	N/A		Blank6	Methionine	(No IS)	N/A	N/A	N/A	N/A	N/A
Blank_1	13C15N_Met_6	N/A		Blank_1	13C15N_Met_6	N/A		Blank6	sam_2	(No IS)	N/A	1537	N/A	N/A	3.92
								Blank6	sah_2	(No IS)	N/A	419.2	N/A	N/A	8.69
								Blank6	met_2	(No IS)	N/A	1573	N/A	N/A	5.78
Blank_1	SAM	N/A		Blank_1	SAM	N/A		Blank6	13C15N_Met_or5	(No IS)	N/A	2012	N/A	N/A	6.19
Blank_1	13C15N_SAM_6	N/A		Blank_1	13C15N_SAM_6	N/A		Blank6	13C15N_Met_5	(No IS)	N/A	N/A	N/A	N/A	N/A
								Blank6	13C15N_Met_or6	(No IS)	N/A	1715	N/A	N/A	6.03
								Blank6	13C15N_Met_6	(No IS)	N/A	643	N/A	N/A	6.68
Blank_1	SAH	N/A		Blank_1	SAH	647.266		Blank6	13C15N_SAM_5	(No IS)	N/A	N/A	N/A	N/A	N/A
Blank_1	13C15N_SAH_5	N/A		Blank_1	13C15N_SAH_5	N/A		Blank6	13C15N_SAM_6	(No IS)	N/A	N/A	N/A	N/A	N/A
								Blank6	13C15N_SAH_4	(No IS)	N/A	491.3	N/A	N/A	8.59
								Blank6	13C15N_SAH_5	(No IS)	N/A	363.6	N/A	N/A	8.97
Blank_2	Met	N/A						Blank7	Methionine	(No IS)	N/A	N/A	N/A	N/A	N/A
Blank_2	13C15N_Met_or5	N/A						Blank7	sam_2	(No IS)	N/A	1065	N/A	N/A	3.74
Blank_2	13C15N_Met_5	N/A		Blank_2	Met	N/A		Blank7	sah_2	(No IS)	N/A	474.3	N/A	N/A	8.19
Blank_2	13C15N_Met_or6	262.465		Blank_2	13C15N_Met_or5	N/A		Blank7	met_2	(No IS)	N/A	N/A	N/A	N/A	N/A
Blank_2	13C15N_Met_6	N/A		Blank_2	13C15N_Met_5	N/A		Blank7	13C15N_Met_or5	(No IS)	N/A	15490	N/A	N/A	6.51
Blank_2	SAM	N/A		Blank_2	13C15N_Met_or6	N/A		Blank7	13C15N_Met_5	(No IS)	N/A	1224	N/A	N/A	6.21
Blank_2	13C15N_SAM_5	N/A		Blank_2	13C15N_Met_6	N/A		Blank7	13C15N_Met_or6	(No IS)	N/A	18430	N/A	N/A	6.66
Blank_2	13C15N_SAM_6	N/A		Blank_2	SAM	N/A		Blank7	13C15N_Met_6	(No IS)	N/A	1189	N/A	N/A	6.26
Blank_2	SAH	1000.75		Blank_2	13C15N_SAM_5	N/A		Blank7	13C15N_SAM_5	(No IS)	N/A	66.19	N/A	N/A	3.8
Blank_2	13C15N_SAH_4	N/A		Blank_2	13C15N_SAM_6	N/A		Blank7	13C15N_SAM_6	(No IS)	N/A	N/A	N/A	N/A	N/A
Blank_2	13C15N_SAH_5	N/A		Blank_2	SAH	N/A		Blank7	13C15N_SAH_4	(No IS)	N/A	279.1	N/A	N/A	8.89
Blank_4	Met	N/A		Blank_2	13C15N_SAH_4	N/A		Blank7	13C15N_SAH_5	(No IS)	N/A	136.9	N/A	N/A	8.33
Blank_4	13C15N_Met_or5	N/A		Blank_2	13C15N_SAH_5	N/A		Blank8	Methionine	(No IS)	N/A	N/A	N/A	N/A	N/A
Blank_4	13C15N_Met_5	N/A		Blank_3	Met	N/A		Blank8	sam_2	(No IS)	N/A	817.2	N/A	N/A	3.8
Blank_4	13C15N_Met_or6	N/A		Blank_3	13C15N_Met_or5	N/A		Blank8	sah_2	(No IS)	N/A	472.8	N/A	N/A	8.57
Blank_4	13C15N_Met_6	N/A		Blank_3	13C15N_Met_5	N/A		Blank8	met_2	(No IS)	N/A	1073	N/A	N/A	6.11
Blank_4	SAM	N/A		Blank_3	13C15N_Met_or6	N/A		Blank8	13C15N_Met_or5	(No IS)	N/A	7383	N/A	N/A	6.38
Blank_4	13C15N_SAM_5	N/A		Blank_3	13C15N_Met_6	N/A		Blank8	13C15N_Met_5	(No IS)	N/A	678.3	N/A	N/A	6.28
Blank_4	13C15N_SAM_6	N/A		Blank_3	SAM	N/A		Blank8	13C15N_Met_or6	(No IS)	N/A	7500	N/A	N/A	5.75
Blank_4	SAH	N/A		Blank_3	13C15N_SAM_5	N/A		Blank8	13C15N_Met_6	(No IS)	N/A	917.5	N/A	N/A	6.24
Blank_4	13C15N_SAH_4	N/A		Blank_3	13C15N_SAM_6	N/A		Blank8	13C15N_SAM_5	(No IS)	N/A	140.7	N/A	N/A	3.84
Blank_4	13C15N_SAH_5	N/A		Blank_3	SAH	N/A		Blank8	13C15N_SAM_6	(No IS)	N/A	314.7	N/A	N/A	4.05
Blank_5	Met	N/A		Blank_3	13C15N_SAH_4	N/A		Blank8	13C15N_SAH_4	(No IS)	N/A	146.3	N/A	N/A	8.91
Blank_5	13C15N_Met_or5	N/A		Blank_3	13C15N_SAH_5	N/A		Blank8	13C15N_SAH_5	(No IS)	N/A	428	N/A	N/A	8.7
Blank_5	13C15N_Met_5	N/A		Blank_5	Met	N/A		Std	Methionine	(No IS)	N/A	34710000	N/A	N/A	6.21
Blank_5	13C15N_Met_or6	646.829		Blank_5	13C15N_Met_or5	N/A		Std	sam_2	(No IS)	N/A	4302000	N/A	N/A	3.71
Blank_5	13C15N_Met_6	N/A		Blank_5	13C15N_Met_5	N/A		Std	sah_2	(No IS)	N/A	15380000	N/A	N/A	8.56
Blank_5	SAM	N/A		Blank_5	13C15N_Met_or6	N/A		Std	met_2	(No IS)	N/A	18730000	N/A	N/A	6.21
Blank_5	13C15N_SAM_5	N/A		Blank_5	13C15N_Met_6	N/A		Std	13C15N_Met_or5	(No IS)	N/A	3415	N/A	N/A	6.54
Blank_5	13C15N_SAM_6	N/A		Blank_5	SAM	N/A		Std	13C15N_Met_5	(No IS)	N/A	842.8	N/A	N/A	5.88
Blank_5	SAH	N/A		Blank_5	13C15N_SAM_5	N/A		Std	13C15N_Met_or6	(No IS)	N/A	1568	N/A	N/A	5.98
Blank_5	13C15N_SAH_4	N/A		Blank_5	13C15N_SAM_6	N/A		Std	13C15N_Met_6	(No IS)	N/A	N/A	N/A	N/A	N/A
Blank_5	13C15N_SAH_5	N/A		Blank_5	SAH	N/A		Std	13C15N_SAM_5	(No IS)	N/A	101.5	N/A	N/A	4.09
Blank_6	Met	N/A		Blank_5	13C15N_SAH_4	N/A		Std	13C15N_SAM_6	(No IS)	N/A	35.77	N/A	N/A	3.53
Blank_6	13C15N_Met_or5	N/A		Blank_5	13C15N_SAH_5	N/A		Std	13C15N_SAH_4	(No IS)	N/A	21960	N/A	N/A	8.55
Blank_6	13C15N_Met_5	N/A		Blank_6	Met	N/A		Std	13C15N_SAH_5	(No IS)	N/A	10070	N/A	N/A	8.06
Blank_6	13C15N_Met_or6	514.932		Blank_6	13C15N_Met_or5	N/A		T0_1	Methionine	(No IS)	N/A	122500	N/A	N/A	6.22
Blank_6	13C15N_Met_6	N/A		Blank_6	13C15N_Met_5	N/A		T0_1	sam_2	(No IS)	N/A	740800	N/A	N/A	3.72
Blank_6	SAM	N/A		Blank_6	13C15N_Met_or6	N/A		T0_1	sah_2	(No IS)	N/A	8353	N/A	N/A	8.58
Blank_6	13C15N_SAM_5	N/A		Blank_6	13C15N_Met_6	N/A		T0_1	met_2	(No IS)	N/A	59630	N/A	N/A	6.22
Blank_6	13C15N_SAM_6	N/A		Blank_6	SAM	N/A		T0_1	13C15N_Met_or5	(No IS)	N/A	64680	N/A	N/A	6.16
Blank_6	SAH	N/A		Blank_6	13C15N_SAM_5	N/A		T0_1	13C15N_Met_5	(No IS)	N/A	550.3	N/A	N/A	6.01
Blank_6	13C15N_SAH_4	N/A		Blank_6	13C15N_SAM_6	N/A		T0_1	13C15N_Met_or6	(No IS)	N/A	5200	N/A	N/A	6.65
Blank_6	13C15N_SAH_5	N/A		Blank_6	SAH	N/A		T0_1	13C15N_Met_6	(No IS)	N/A	6247	N/A	N/A	6.19
Std_met_related	Met	4.16261e+06		Blank_6	13C15N_SAH_4	N/A		T0_1	13C15N_SAM_5	(No IS)	N/A	155.8	N/A	N/A	3.6
Std_met_related	13C15N_Met_or5	N/A		Blank_6	13C15N_SAH_5	N/A		T0_1	13C15N_SAM_6	(No IS)	N/A	35.77	N/A	N/A	4.15
Std_met_related	13C15N_Met_5	N/A		Std_13C15NMet	Met	1597.66		T0_1	13C15N_SAH_4	(No IS)	N/A	545.5	N/A	N/A	9.03
Std_met_related	13C15N_Met_or6	506.54		Std_13C15NMet	13C15N_Met_or5	173291		T0_1	13C15N_SAH_5	(No IS)	N/A	1822	N/A	N/A	8.05
Std_met_related	13C15N_Met_6	N/A		Std_13C15NMet	13C15N_Met_5	54218.7		T0_2	Methionine	(No IS)	N/A	85160	N/A	N/A	6.23
Std_met_related	SAM	34599.8		Std_13C15NMet	13C15N_Met_or6	3832.94		T0_2	sam_2	(No IS)	N/A	537800	N/A	N/A	3.71
Std_met_related	13C15N_SAM_5	N/A		Std_13C15NMet	13C15N_Met_6	3.66096e+06		T0_2	sah_2	(No IS)	N/A	8508	N/A	N/A	8.57
Std_met_related	13C15N_SAM_6	N/A		Std_13C15NMet	SAM	N/A		T0_2	met_2	(No IS)	N/A	41700	N/A	N/A	6.23
Std_met_related	SAH	5.8974e+06		Std_13C15NMet	13C15N_SAM_5	N/A		T0_2	13C15N_Met_or5	(No IS)	N/A	48890	N/A	N/A	6.14
Std_met_related	13C15N_SAH_4	8133.18		Std_13C15NMet	13C15N_SAM_6	N/A		T0_2	13C15N_Met_5	(No IS)	N/A	442.1	N/A	N/A	5.98
Std_met_related	13C15N_SAH_5	1091.61		Std_13C15NMet	SAH	N/A		T0_2	13C15N_Met_or6	(No IS)	N/A	14420	N/A	N/A	5.89
				Std_13C15NMet	13C15N_SAH_4	N/A		T0_2	13C15N_Met_6	(No IS)	N/A	5100	N/A	N/A	6.18
				Std_13C15NMet	13C15N_SAH_5	N/A		T0_2	13C15N_SAM_5	(No IS)	N/A	117.6	N/A	N/A	3.72
				Std_met_related	Met	3.48306e+06		T0_2	13C15N_SAM_6	(No IS)	N/A	115.7	N/A	N/A	3.67
				Std_met_related	13C15N_Met_or5	N/A		T0_2	13C15N_SAH_4	(No IS)	N/A	458.5	N/A	N/A	8.07
				Std_met_related	13C15N_Met_5	N/A		T0_2	13C15N_SAH_5	(No IS)	N/A	1483	N/A	N/A	8.04
				Std_met_related	13C15N_Met_or6	493.324		T1_1	Methionine	(No IS)	N/A	94510	N/A	N/A	6.21
				Std_met_related	13C15N_Met_6	N/A		T1_1	sam_2	(No IS)	N/A	300200	N/A	N/A	3.73
				Std_met_related	SAM	1.18625e+06		T1_1	sah_2	(No IS)	N/A	6200	N/A	N/A	8.57
				Std_met_related	13C15N_SAM_5	N/A		T1_1	met_2	(No IS)	N/A	40120	N/A	N/A	6.21
				Std_met_related	13C15N_SAM_6	N/A		T1_1	13C15N_Met_or5	(No IS)	N/A	223200	N/A	N/A	6.17
				Std_met_related	SAH	2.52934e+06		T1_1	13C15N_Met_5	(No IS)	N/A	34840	N/A	N/A	6.2
				Std_met_related	13C15N_SAH_4	3614.73		T1_1	13C15N_Met_or6	(No IS)	N/A	29100	N/A	N/A	5.83
				Std_met_related	13C15N_SAH_5	N/A		T1_1	13C15N_Met_6	(No IS)	N/A	2188000	N/A	N/A	6.2
								T1_1	13C15N_SAM_5	(No IS)	N/A	14740	N/A	N/A	3.72
								T1_1	13C15N_SAM_6	(No IS)	N/A	244700	N/A	N/A	3.72
								T1_1	13C15N_SAH_4	(No IS)	N/A	677.1	N/A	N/A	8.07
								T1_1	13C15N_SAH_5	(No IS)	N/A	3701	N/A	N/A	8.55
								T1_2	Methionine	(No IS)	N/A	82170	N/A	N/A	6.21
								T1_2	sam_2	(No IS)	N/A	245200	N/A	N/A	3.74
								T1_2	sah_2	(No IS)	N/A	7041	N/A	N/A	8.57
								T1_2	met_2	(No IS)	N/A	42740	N/A	N/A	6.21
								T1_2	13C15N_Met_or5	(No IS)	N/A	254000	N/A	N/A	6.17
								T1_2	13C15N_Met_5	(No IS)	N/A	37090	N/A	N/A	6.21
								T1_2	13C15N_Met_or6	(No IS)	N/A	27400	N/A	N/A	5.78
								T1_2	13C15N_Met_6	(No IS)	N/A	2495000	N/A	N/A	6.2
								T1_2	13C15N_SAM_5	(No IS)	N/A	12320	N/A	N/A	3.72
								T1_2	13C15N_SAM_6	(No IS)	N/A	202700	N/A	N/A	3.72
								T1_2	13C15N_SAH_4	(No IS)	N/A	1132	N/A	N/A	8.49
								T1_2	13C15N_SAH_5	(No IS)	N/A	3591	N/A	N/A	8.58
								T3_1	Methionine	(No IS)	N/A	57410	N/A	N/A	6.21
								T3_1	sam_2	(No IS)	N/A	497200	N/A	N/A	3.73
								T3_1	sah_2	(No IS)	N/A	5720	N/A	N/A	8.57
								T3_1	met_2	(No IS)	N/A	32420	N/A	N/A	6.21
								T3_1	13C15N_Met_or5	(No IS)	N/A	134000	N/A	N/A	6.17
								T3_1	13C15N_Met_5	(No IS)	N/A	21060	N/A	N/A	6.2
								T3_1	13C15N_Met_or6	(No IS)	N/A	23720	N/A	N/A	5.73
								T3_1	13C15N_Met_6	(No IS)	N/A	1385000	N/A	N/A	6.2
								T3_1	13C15N_SAM_5	(No IS)	N/A	17740	N/A	N/A	3.72
								T3_1	13C15N_SAM_6	(No IS)	N/A	292600	N/A	N/A	3.71
								T3_1	13C15N_SAH_4	(No IS)	N/A	778	N/A	N/A	9.03
								T3_1	13C15N_SAH_5	(No IS)	N/A	3708	N/A	N/A	8.54
								T3_2	Methionine	(No IS)	N/A	70960	N/A	N/A	6.21
								T3_2	sam_2	(No IS)	N/A	485600	N/A	N/A	3.74
								T3_2	sah_2	(No IS)	N/A	5927	N/A	N/A	8.58
								T3_2	met_2	(No IS)	N/A	33700	N/A	N/A	6.21
								T3_2	13C15N_Met_or5	(No IS)	N/A	150600	N/A	N/A	6.18
								T3_2	13C15N_Met_5	(No IS)	N/A	24780	N/A	N/A	6.2
								T3_2	13C15N_Met_or6	(No IS)	N/A	10320	N/A	N/A	6.42
								T3_2	13C15N_Met_6	(No IS)	N/A	1592000	N/A	N/A	6.2
								T3_2	13C15N_SAM_5	(No IS)	N/A	17610	N/A	N/A	3.72
								T3_2	13C15N_SAM_6	(No IS)	N/A	276600	N/A	N/A	3.72
								T3_2	13C15N_SAH_4	(No IS)	N/A	470.6	N/A	N/A	9
								T3_2	13C15N_SAH_5	(No IS)	N/A	3445	N/A	N/A	8.58
								T6_1	Methionine	(No IS)	N/A	86100	N/A	N/A	6.21
								T6_1	sam_2	(No IS)	N/A	481600	N/A	N/A	3.74
								T6_1	sah_2	(No IS)	N/A	4263	N/A	N/A	8.57
								T6_1	met_2	(No IS)	N/A	40400	N/A	N/A	6.21
								T6_1	13C15N_Met_or5	(No IS)	N/A	246800	N/A	N/A	6.17
								T6_1	13C15N_Met_5	(No IS)	N/A	39210	N/A	N/A	6.2
								T6_1	13C15N_Met_or6	(No IS)	N/A	15490	N/A	N/A	5.84
								T6_1	13C15N_Met_6	(No IS)	N/A	2702000	N/A	N/A	6.19
								T6_1	13C15N_SAM_5	(No IS)	N/A	10190	N/A	N/A	3.73
								T6_1	13C15N_SAM_6	(No IS)	N/A	157700	N/A	N/A	3.72
								T6_1	13C15N_SAH_4	(No IS)	N/A	886.2	N/A	N/A	8.98
								T6_1	13C15N_SAH_5	(No IS)	N/A	1521	N/A	N/A	8.57
								T6_2	Methionine	(No IS)	N/A	78510	N/A	N/A	6.21
								T6_2	sam_2	(No IS)	N/A	425500	N/A	N/A	3.74
								T6_2	sah_2	(No IS)	N/A	3868	N/A	N/A	8.58
								T6_2	met_2	(No IS)	N/A	38010	N/A	N/A	6.2
								T6_2	13C15N_Met_or5	(No IS)	N/A	228200	N/A	N/A	6.17
								T6_2	13C15N_Met_5	(No IS)	N/A	31930	N/A	N/A	6.2
								T6_2	13C15N_Met_or6	(No IS)	N/A	19910	N/A	N/A	6.39
								T6_2	13C15N_Met_6	(No IS)	N/A	2184000	N/A	N/A	6.2
								T6_2	13C15N_SAM_5	(No IS)	N/A	9354	N/A	N/A	3.74
								T6_2	13C15N_SAM_6	(No IS)	N/A	151500	N/A	N/A	3.73
								T6_2	13C15N_SAH_4	(No IS)	N/A	605.5	N/A	N/A	8.99
								T6_2	13C15N_SAH_5	(No IS)	N/A	1199	N/A	N/A	8.57

## Sheet: labeled peak area processed
processed n=1														processed n=2	T0		Area under the peak	T1		Area under the peak	T3		Area under the peak	T6		Area under the peak		n=3	Components	T0			Q1 (parent ion)	Q3 (daughter ion)				compiled (n=1,2,3)	Percent labelled Methionine
T0		area under the peak	1 hr		area under the peak	3 hr		area under the peak	6 hr		area under the peak				J1	Met	612058	J2	Met	138275	J3	Met	138300	J4	Met	115539				Rep 1	Rep 2	Methionine	150.1	104.1					n=1	n=2	n=3	Average	SD	p value (wrt T1)	p value(wrt T0)
I1	Met	1.15848e+06	I2	Met	32709.6	I3	Met	41527.1	I4	Met	3592.69				J1	13C15N_Met_6	4748.95	J2	13C15N_Met_6	3.3748e+06	J3	13C15N_Met_6	5.2723e+06	J4	13C15N_Met_6	2.31912e+06			Methionine	122500	85160	13C15N_Met_6	156.1	60				T0	0	0.769924	5.65034	2.14009	3.06425
I1	13C15N_Met_6	0	I2	13C15N_Met_6	4.49031e+06	I3	13C15N_Met_6	5.33912e+06	I4	13C15N_Met_6	520003																		13C15N_Met_6	6247	5100	SAM	399	250				T1	99.2768	96.064	96.8116	97.3841	1.68119		1.20536e-06
																																13C15N_SAM_6	405	250				T3	99.2282	97.4439	95.7329	97.4683	1.74778		1.24637e-06
															J1	SAM	4193.96	J2	SAM	32489.7	J3	SAM	916.099	J4	SAM	53366.9			SAM	740800	537800	SAH	385	136				T6	99.3138	95.2544	96.53	97.0327	2.07589		1.53775e-06
I1	SAM	303776	I2	SAM	1237.97	I3	SAM	141241	I4	SAM	117993				J1	13C15N_SAM_6	0	J2	13C15N_SAM_6	24046.2	J3	13C15N_SAM_6	420.905	J4	13C15N_SAM_6	17081.5			13C15N_SAM_6	35.77	115.7	13C15N_SAH_5	390	136					Percent labelled SAM
I1	13C15N_SAM_6	0	I2	13C15N_SAM_6	990.38	I3	13C15N_SAM_6	63021.7	I4	13C15N_SAM_6	36294.4																											T0	0	0	0.0215089	0.00716965	0.0124182
															J1	SAH	9240.32	J2	SAH	2539.98	J3	SAH	2213.66	J4	SAH	3125.44			SAH	8353	8508							T1	44.4445	42.5326	45.2556	44.0776	1.39808		6.73815e-07
															J1	13C15N_SAH_5	0	J2	13C15N_SAH_5	1297.04	J3	13C15N_SAH_5	505.347	J4	13C15N_SAH_5	748.187			13C15N_SAH_5	1822	1483							T3	30.8532	31.4812	36.2897	32.8747	2.97409	0.00411741	4.38946e-05
I1	SAH	12920.7	I2	SAH	1726.78	I3	SAH	6424.06	I4	SAH	3257.38																											T6	23.5239	24.2469	26.2565	24.6758	1.41588	7.20607e-05	7.1834e-06
I1	13C15N_SAH_5	0	I2	13C15N_SAH_5	1001.81	I3	13C15N_SAH_5	3780.03	I4	13C15N_SAH_5	965.517																		Analysis										Percent labelled SAH
																													n=3	Unlabelled Methionine		Labelled Methionine			Percent labelled Methionine			T0	0	0	14.8434	4.94779	8.56982
														n=2(final calculation)	Unlabelled Methionine	Labelled Methionine	Percent labelled Methionine													Rep1	Rep2	Rep1	Rep2		Rep1	Rep2		T1	36.7154	33.8033	33.7754	34.7647	1.68943		0.004097
n=1(final calculation)	Unlabelled Methionine	Labelled Methionine	Percent labelled Methionine											T0	612058	4748.95	0.769924												T0	122500	85160	6247	5100		4.85215	5.65034		T3	37.0442	18.5858	36.7584	30.7961	10.5755	0.555916	0.0302412
T0	1.15848e+06	0	0											T1	138275	3.3748e+06	96.064												T1	94510	82170	2188000	2495000		95.8594	96.8116		T6	22.8638	19.3149	23.6629	21.9472	2.31441	0.00149519	0.0294628
T1	32709.6	4.49031e+06	99.2768											T3	138300	5.2723e+06	97.4439												T3	57410	70960	1385000	1592000		96.0199	95.7329
T3	41527.1	5.33912e+06	99.2282											T6	115539	2.31912e+06	95.2544												T6	86100	78510	2702000	2184000		96.9119	96.53
T6	3592.69	520003	99.3138												Unlabelled SAM	Labelled SAM	Percent labelled SAM
	Unlabelled SAM	Labelled SAM	Percent labelled SAM											T0	4193.96	0	0													Rep1 and rep2 are technical replicates
T0	303776	0	0											T1	32489.7	24046.2	42.5326
T1	1237.97	990.38	44.4445											T3	916.099	420.905	31.4812													Unlabelled SAM		Labelled SAM			Percent labelled SAM
T3	141241	63021.7	30.8532											T6	53366.9	17081.5	24.2469													Rep1	Rep2	Rep1	Rep2		Rep1	Rep2
T6	117993	36294.4	23.5239												Unlabelled SAH	Labelled SAH	Percent labelled SAH												T0	740800	537800	35.77	115.7		0.00482833	0.0215089
	Unlabelled SAH	Labelled SAH	Percent labelled SAH											T0	9240.32		0												T1	300200	245200	244700	202700		44.9073	45.2556
T0	12920.7	0	0											T1	2539.98	1297.04	33.8033												T3	497200	485600	292600	276600		37.0474	36.2897
T1	1726.78	1001.81	36.7154											T3	2213.66	505.347	18.5858												T6	481600	425500	157700	151500		24.6676	26.2565
T3	6424.06	3780.03	37.0442											T6	3125.44	748.187	19.3149
T6	3257.38	965.517	22.8638																											Unlabelled SAH		Labelled SAH			Percent labelled SAH
																														Rep1	Rep2	Rep1	Rep2		Rep1	Rep2
																													T0	8353	8508	1822	1483		17.9066	14.8434
																													T1	6200	7041	3701	3591		37.3801	33.7754
																													T3	5720	5927	3708	3445		39.3297	36.7584
																													T6	4263	3868	1521	1199		26.2967	23.6629
																																			Rep2 used for calculation
